# Supplementary material for: Upregulation of chloroplastic pyruvate dehydrogenase genes in rice leaf would potentially drive the in planta photorespiratory bypass for higher biomass
Source: Research Square preprint supplement (doi:10.21203/rs.3.rs-562750/v1), 2021-05-28
Supplement: Supplementary file 1 [file c680f6e37a3cadab9dff4c88.xlsx]

## Sheet: RPKM values
Between tissue comparison
EXPRESSION VALUES (in RPKM)
					APO						BAM4234						CROSSA
					L v P		L v G		P v G		L v P		L v G		P v G		L v P		L v G		P v G
AA size	chr	as per homolog of wheat	gene	gene ID	LEAF	PEDUNCLE	LEAF	GRAIN	PEDUNCLE	GRAIN	LEAF	PEDUNCLE	LEAF	GRAIN	PEDUNCLE	GRAIN	LEAF	PEDUNCLE	LEAF	GRAIN	PEDUNCLE	GRAIN
303	9		cpPGLP (or PGP)	BGIOSGA030128-TA	14.68	23.89	11.57	3.47	22.37	4.06	13.92	18.7	15.2681	8.75045	27.2063	11.8754	10.25	14.88	9.77	6.33	14.64	6.41
365	4			BGIOSGA014826-TA	1310.71	439.05	1033.18	9.49	410.88	11.07	561.44	224.36	614.377	2.49654	326.229	3.38655	578.17	289.9	533.84	1.67	285.66	1.7
308	8	Ancient paralogs		BGIOSGA029099-TA	6.65	5.81	5.24	3.65	5.45	4.26	6.08	4.56	6.67272	8.07054	6.6299	10.9564	3.33	3.31	3.15	4.82	3.25	4.95
235	1			BGIOSGA000655-TA	21.68	13.02	17.01	17.48	12.17	20.39	16.16	11.62	17.6894	25.802	16.8948	34.9986	18.18	17.78	16.69	18.8	17.53	19.32
231	2			BGIOSGA005367-TA	36.9	20.73	29.01	6.5	19.32	7.59	25.18	12.31	27.5263	7.02948	17.9013	9.53793	25.54	23.29	23.54	5.77	22.94	5.91
363	7		pGOX	BGIOSGA026138-TA (GLO4)	14.83	34.25	11.71	10.04	32.06	11.71	21.68	67.38	23.8543	21.5321	98.0022	29.1739	33.58	87.68	29.24	17.77	86.25	18.13
369	7	Peroxisomal		BGIOSGA025165-TA (GLO5)	1516.19	508.81	1194.16	31.91	475.15	37.23	717.43	376.35	784.678	48.3556	547.217	65.5509	834.9	610.79	774.2	44.78	601.58	45.76
369	3	Peroxisomal		BGIOSGA013686-TA (GLO1)	1092.34	630.8	860.78	13.16	588.39	15.34	558.11	491.95	610.638	3.19367	715.374	4.33342	799.89	784.63	739.56	4.17	772.39	4.29
367	4	Peroxisomal		BGIOSGA017163-TA (GLO3)	0.6	20.87	0.48	17.72	19.5	20.68	1.12	9.31	1.23001	16.445	13.5443	22.3135	2.65	16.5	2.28	7.19	16.23	7.41
285	4	Ancient paralogs		BGIOSGA017164-TA	6.1	3.64	4.81	1.33	3.41	1.56	1.91	2.6	2.09751	6.31892	3.7732	8.57672	6.86	2.94	5.81	1.29	2.89	1.32
268	3			BGIOSGA013683-TA	1.02	0.26	0.8	0	0.24	0	0.97	0.44	1.07227	0	0.634343	0	1.11	0.44	0.97	0	0.44	0
172	8			BGIOSGA028153-TA									0	0.866953	0	1.18094	0.36	0.72	0.36	0.61	0.71	0.63
399	NA			BGIOSGA038673-TA
341	NA			BGIOSGA039507-TA
379	NA			BGIOSGA038447-TA
363	4			BGIOSGA015256-TA
485	7	Peroxisomal, identified through Sorghum orthologs	pGGT	BGIOSGA024963-TA	1161.29	551.31	914.97	26.12	515.56	30.45	439.49	329.35	480.997	16.9468	479.043	22.994	879.81	544.99	816.43	16.26	536.54	16.73
486	3	Mitochondrial		BGIOSGA011956-TA	8.08	11.5	6.35	95.06	10.78	110.98	6.63	15.07	7.27761	145.894	21.9187	197.794	3.18	14.82	2.77	127.36	14.59	130.13
480	5			BGIOSGA017874-TA	0.47	14.37	0.37	0.89	13.44	1.03	2.57	10.29	2.81544	1.85961	14.9664	2.52462	2.55	12.74	2.18	1.57	12.55	1.61
436	3			BGIOSGA010778-TA	0.21	0.42	0.17	0.49	0.39	0.57	0.98	1.02	1.06448	0.155678	1.48027	0.210803	0.74	1.24	0.62	0.35	1.22	0.37
347	11		mSHMT	BGIOSGA035211-TA	143.65	113.07	113.03	43.27	105.36	50.48	109.33	116.37	119.604	55.177	169.182	74.8649	93.49	190.86	85.66	48.82	187.88	50.43
531	6			BGIOSGA022876-TA	9.29	16.32	7.32	41	15.23	47.83	2.77	3.87	3.05255	19.9814	5.63341	27.1637	3.61	6.07	3.35	14.71	5.98	15.18
571	5			BGIOSGA018007-TA	44.18	15.99	34.69	3.37	14.98	3.93	28.55	17.29	31.1911	4.44637	25.1342	6.03225	22.92	14.44	21.32	3.58	14.22	3.69
513	3			BGIOSGA013524-TA	1787.42	692.68	1409.81	29.45	648.11	34.36	657.84	482.78	720.884	38.0001	702.243	51.5119	1080.43	744.75	1008.12	35.28	733.13	36.07
294	12			BGIOSGA036327-TA	0.08	0.12	0.06	0	0.11	0	22.79	25.18	24.9894	54.7663	36.6365	74.2491	37.96	43.03	33.89	77.54	42.33	79.41
600	1			BGIOSGA004904-TA	35.93	19.77	28.26	10.02	18.55	11.69	17.4	9.98	19.0438	15.1387	14.4982	20.541	15.72	14.77	14.78	11.89	14.54	12.23
1033	1	P protein	mGDC	BGIOSGA004313-TA	1000.52	317.71	787.61	15.72	296.53	18.33	985.06	246.08	1076.07	19.5477	357.693	26.5144	669	335.73	623.47	19	330.59	19.47
1031	6	P protein		BGIOSGA020897-TA	749.45	235.84	589.47	6.75	220	7.87	589.49	200.6	644.39	3.77475	291.602	5.11953	627.12	258.68	585.52	3.75	254.76	3.89
468	NA			BGIOSGA040295-TA
418	1		cpGLYK	BGIOSGA004212-TA	415.63	162.89	327.63	5.23	152.58	6.09	198.7	133.1	217.266	6.56685	193.611	8.90759	288.61	172.8	265.66	7.4	170.1	7.54
428	4	Chloroplastic	cpGS2	BGIOSGA014182-TA	1122.72	520.1	885.56	13.62	487.52	15.9	591.62	379.62	648.083	7.17244	552.381	9.7472	784.52	492.19	705.65	5.42	484.38	5.57
370	3	Cytosolic		BGIOSGA009926-TA	0.36	0.38	0.29	49	0.36	57.17	1.1	2.97	1.21049	112.48	4.32372	152.523	0.2	1.69	0.18	66.68	1.66	68.42
364	2			BGIOSGA005667-TA	605.05	711.92	476.77	32.5	663.12	37.88	773.92	760	845.863	22.3027	1104.3	30.2744	759.31	1208.36	662.58	21.91	1189.55	22.58
357	3			BGIOSGA011196-TA	5.59	56.41	4.39	73.52	52.71	85.77	5.83	56.16	6.40089	53.0012	81.6356	71.8991	3.61	28.02	3.26	51.88	27.59	53.16
1615	7	Ferredoxin-dependent	cpGOGAT	BGIOSGA023784-TA	97.37	70.25	76.68	2.14	65.88	2.49	28.25	39.56	30.9554	2.95907	57.5573	4.01822	41.14	36.49	38.56	2.7	35.89	2.77
340	9	Bact D SU		BGIOSGA031228-TA
2157	1	NADH-dependent		BGIOSGA001013-TA	1.13	1.15	0.89	2.37	1.08	2.76	0.98	1.17	1.07856	3.3787	1.70638	4.58799	0.96	0.89	0.83	4.12	0.88	4.21
2193	5	NADH-dependent		BGIOSGA020330-TA	0.39	0.85	0.31	0.53	0.79	0.61	0.66	0.78	0.724048	0.155241	1.1277	0.210735	1.56	1.32	1.33	0.4	1.29	0.42
402	8	Peroxisomal	pSGT	BGIOSGA026721-TA	2716.91	1238.19	2140.1	26.27	1151.08	30.61	1751.55	911.39	1915.65	8.0661	1324.94	10.9382	2380.37	1642.2	2220.63	10.46	1617.81	10.83
424	3	Phosphoserine aminotransferase		BGIOSGA011897-TA	29.88	207.76	23.45	50.97	191.9	59.39	27.91	59.22	30.5962	60.1252	86.0433	81.4877	15.46	39.86	14.15	49.3	39.24	50.86
410	2	NADH-dependent	pHPR1	BGIOSGA007314-TA	782.27	448.03	616.1	7.33	418.3	8.55	399.21	195.06	436.031	2.4879	283.666	3.37572	512.24	342.91	483.74	1.95	337.6	1.99
469	1	NADPH-dependent	cHPR2	BGIOSGA002081-TA	157.12	76.83	123.72	24.62	71.79	28.71	83.09	43.39	90.8402	14.8984	63.0737	20.2446	92.45	82.31	84.9	10.25	81.07	10.58
175	12		rbcS	BGIOSGA037260-TA	5365.37	5170.36	4223.55	150.46	4824.76	175.41	2457.84	2750.24	2683.71	35.3026	3998.86	47.9465	4021.67	4660.32	3686.74	39.67	4592.28	41.29
175	NA			BGIOSGA038154-TA	7682.47	5871.64	6042.51	97.38	5478.53	113.5	1353.73	1531.64	1476.82	18.4643	2226.09	25.0326	1755.97	1602.21	1635.75	11.42	1579.03	11.8
175	12			BGIOSGA037257-TA	26185.5	14667.3	20615.1	636.93	13649.6	742.67	10239.8	7962.06	11170.9	155.925	11575.1	211.718	9714.88	10696.2	8876.97	143.17	10533.5	148.07
138	NA			BGIOSGA040274-TA	16.99	8.37	13.39	34.7	7.79	40.5	8388.85	6950.37	9156.49	59.5616	10105.9	80.8955	12282.8	14406.4	11226.5	170.74	14185.6	176.92
175	5			BGIOSGA018498-TA (RBCS)	11208.2	6834.55	8817.52	233.55	6356.37	272.36	18089.5	10326	19729.4	84.2246	15009.1	114.254	6578.23	8034.26	6201.17	74.87	7921.62	77.59
183	2			BGIOSGA007558-TA	2.43	2.64	1.92	20.95	2.47	24.43	4.54	3.44	4.9547	18.7999	4.99481	25.5205	9.26	3.63	8.02	6.78	3.57	6.97
400	3	Chloroplastic	PDC	BGIOSGA013212-TA	36.68	54.82	28.86	49.93	51.17	58.23	35.31	29.34	38.62	55.44	42.65	75.26	28.47	36.94	26.01	50.95	36.38	52.38
425	4	Chloroplastic		BGIOSGA015796-TA	8.1	28.53	6.37	45.58	26.62	53.17	10.08	18.77	11.05	67.88	27.3	92.16	9.72	28.99	8.72	54.8	28.53	56.57
239	12			BGIOSGA036512-TA	2.78	7.44	2.19	17.03	6.97	19.86	1.26	1.95	1.39	24.61	2.84	33.43	1.79	5.22	1.74	14.52	5.13	14.91
374	8			BGIOSGA029064-TA	13.4	10.72	10.54	9.61	10.02	11.21	5.46	7.01	6	6.89	10.19	9.37	1.19	3.71	1.1	4.35	3.65	4.47
391	12			BGIOSGA037802-TA	24.21	81.84	19.07	49.71	76.41	58	20.4	34.52	22.37	55.95	50.2	76	15.82	56.49	13.67	51.29	55.61	52.81
398	6	Mitochondrial		BGIOSGA022620-TA	0.29	2.69	0.23	9.98	2.51	11.64	1.2	2.16	1.32	10.35	3.14	14.04	0.64	2.58	0.61	5.91	2.54	6.06
545	6	Mitochondrial		BGIOSGA022101-TA	8.1	8.64	6.38	5.81	8.11	6.78	4.36	6.49	4.78	9.11	9.43	12.38	6.57	5.52	5.91	2.76	5.43	2.84
557	6	Mitochondrial		BGIOSGA021193-TA	6.44	10.58	5.07	5.97	9.9	6.96	4.71	7.85	5.16	11.4	11.43	15.47	5.41	5.76	4.94	5.89	5.67	6.03
541	7	Mitochondrial		BGIOSGA024430-TA	8.75	16.99	6.89	16.55	15.91	19.32	8.4	11.43	9.2	14.74	16.63	20.04	6.88	11.78	6.16	7.3	11.59	7.54
between genotypes comparison
EXPRESSION VALUES (in RPKM)
					LEAF						PEDUNCLE						GRAIN
					G1 v G2		G1 v G3		G2 v G3		G1 v G2		G1 v G3		G2 v G3		G1 v G2		G1 v G3		G2 v G3
AA size	chr	as per homolog of wheat	gene	gene ID	APO	BAM4234	APO	CROSSA	BAM4234	CROSSA	APO	BAM4234	APO	CROSSA	BAM4234	CROSSA	APO	BAM4234	APO	CROSSA	BAM4234	CROSSA
303	9		cpPGLP (or PGP)	BGIOSGA030128-TA	11.34	12.24	13.05	8.76	12.93	8.32	28.2	25.41	27.43	16.96	23.7	16.36	4.36	8.84	3.52	5.42	9.88	7.36
365	4			BGIOSGA014826-TA	1011.98	493.05	1164.77	504.18	520.31	467.83	517.19	304.85	503.33	330.57	284.29	317.67	12	2.52	9.62	1.45	2.82	1.97
308	8	Ancient paralogs		BGIOSGA029099-TA	5.13	5.35	5.91	2.86	5.65	2.7	6.85	6.2	6.67	3.77	5.78	3.64	4.59	8.16	3.7	4.22	9.11	5.77
235	1			BGIOSGA000655-TA	16.88	14.2	19.56	15.91	14.98	14.71	15.35	15.79	14.93	20.28	14.72	19.48	22.05	26.04	17.71	16.51	29.12	22.59
231	2			BGIOSGA005367-TA	28.65	22.1	33.12	22.3	23.31	20.66	24.4	16.73	23.75	26.56	15.6	25.55	8.18	7.1	6.59	5.03	7.93	6.87
363	7		pGOX	BGIOSGA026138-TA (GLO4)	11.41	19.11	13.09	30.3	20.2	27.06	40.28	91.54	39.21	99.94	85.37	96.44	12.66	21.67	10.16	15.41	24.3	20.99
369	7	Peroxisomal		BGIOSGA025165-TA (GLO5)	1172.49	629.85	1351.28	726.33	664.58	675.75	599.52	511.33	583.43	696.35	476.85	669.93	40.19	48.74	32.32	38.93	54.56	53.08
369	3	Peroxisomal		BGIOSGA013686-TA (GLO1)	843.77	490.1	971.61	697.2	517.17	647.2	743.43	668.4	723.46	894.43	623.34	861.58	16.64	3.23	13.33	3.67	3.6	5.03
367	4	Peroxisomal		BGIOSGA017163-TA (GLO3)	0.46	0.99	0.52	2.41	1.04	2.13	24.54	12.65	23.89	18.81	11.8	18.15	22.29	16.6	17.94	6.34	18.56	8.68
285	4	Ancient paralogs		BGIOSGA017164-TA	4.72	1.68	5.43	6.28	1.78	5.51	4.31	3.53	4.19	3.35	3.29	3.24	1.67	6.38	1.35	1.13	7.13	1.54
268	3			BGIOSGA013683-TA	0.79	0.86	0.91	1.01	0.91	0.9	0.3	0.59	0.29	0.5	0.55	0.48
172	8			BGIOSGA028153-TA			0	0.3	0	0.29			0	0.82	0	0.79	0	0.88	0	0.53	0.98	0.73
399	NA			BGIOSGA038673-TA
341	NA			BGIOSGA039507-TA
379	NA			BGIOSGA038447-TA
363	4			BGIOSGA015256-TA
485	7	Peroxisomal, identified through Sorghum orthologs	pGGT	BGIOSGA024963-TA	897.57	385.98	1033.9	764.69	407.34	712.26	649.34	447.44	631.95	621.34	417.31	598.31	32.98	17.11	26.45	14.3	19.13	19.58
486	3	Mitochondrial		BGIOSGA011956-TA	6.27	5.84	7.25	2.87	6.16	2.56	13.54	20.48	13.18	16.9	19.1	16.29	119.43	147.06	96.28	110.68	164.63	150.96
480	5			BGIOSGA017874-TA	0.37	2.26	0.42	2.32	2.38	2.05	16.91	13.98	16.46	14.53	13.04	13.96	1.12	1.88	0.9	1.37	2.1	1.87
436	3			BGIOSGA010778-TA	0.16	0.86	0.18	0.68	0.9	0.59	0.5	1.39	0.49	1.41	1.29	1.36	0.61	0.16	0.49	0.32	0.18	0.45
347	11		mSHMT	BGIOSGA035211-TA	111.27	96	128.43	81.93	101.3	75.6	133.37	158.12	129.78	217.57	147.45	209.57	54.55	55.72	43.83	43.23	62.27	59.31
531	6			BGIOSGA022876-TA	7.18	2.45	8.27	3.14	2.59	2.92	19.23	5.26	18.71	6.92	4.91	6.66	51.72	20.26	41.53	13	22.56	17.83
571	5			BGIOSGA018007-TA	34.36	25.04	39.78	19.9	26.42	18.56	18.88	23.49	18.37	16.46	21.91	15.84	4.27	4.49	3.42	3.15	5.02	4.32
513	3			BGIOSGA013524-TA	1378.54	578.25	1585.19	935.87	610.48	874.96	814.61	655.87	792.93	849.07	611.71	817.78	37.08	38.29	29.83	30.69	42.88	41.88
294	12			BGIOSGA036327-TA	0.06	20.04	0.07	33.76	21.16	30.64	0.14	34.21	0.13	49.05	31.91	47.34	0	55.21	0	67.65	61.8	92.38
600	1			BGIOSGA004904-TA	27.87	15.28	32.2	13.56	16.13	12.74	23.35	13.56	22.71	16.83	12.64	16.21	12.61	15.29	10.15	10.45	17.09	14.31
1033	1	P protein	mGDC	BGIOSGA004313-TA	774.43	864.03	893.22	580.16	911.36	541.65	374.11	334.38	364.1	382.75	311.81	368.43	19.81	19.73	15.92	16.59	22.06	22.66
1031	6	P protein		BGIOSGA020897-TA	581.01	517.32	671.01	543.22	545.76	507.81	277.79	272.58	270.35	294.93	254.18	283.79	8.55	3.81	6.84	3.34	4.26	4.6
468	NA			BGIOSGA040295-TA
418	1		cpGLYK	BGIOSGA004212-TA	320.9	174.4	369.33	252.1	184	233.48	191.84	180.82	186.7	197	168.64	189.76	6.62	6.63	5.29	6.39	7.41	8.7
428	4	Chloroplastic	cpGS2	BGIOSGA014182-TA	865.83	519.94	995.57	694.77	548.85	633.64	610.71	515.65	594.57	561.08	480.99	540.77	17.13	7.27	13.79	4.76	8.1	6.51
370	3	Cytosolic		BGIOSGA009926-TA	0.28	0.97	0.32	0.18	1.03	0.16	0.45	4.04	0.44	1.92	3.76	1.86	61.73	113.45	49.63	58.38	126.93	79.8
364	2			BGIOSGA005667-TA	467.39	679.11	538.24	684.42	716.41	611.93	840.49	1032.76	817.75	1377.44	962.96	1326.73	41.07	22.55	32.92	19.33	25.17	26.48
357	3			BGIOSGA011196-TA	4.34	5.13	5.02	3.18	5.42	2.91	66.74	76.3	64.92	31.94	71.15	30.75	92.66	53.51	74.46	45.31	59.81	61.88
1615	7	Ferredoxin-dependent	cpGOGAT	BGIOSGA023784-TA	75.35	24.83	86.87	35.52	26.21	33.33	82.69	53.75	80.48	41.59	50.13	40.12	2.7	2.99	2.16	2.36	3.34	3.22
340	9	Bact D SU		BGIOSGA031228-TA
2157	1	NADH-dependent		BGIOSGA001013-TA	0.87	0.86	1.01	0.86	0.91	0.77	1.36	1.59	1.33	1.02	1.49	0.98	2.98	3.42	2.4	3.59	3.81	4.9
2193	5	NADH-dependent		BGIOSGA020330-TA	0.3	0.58	0.35	1.42	0.61	1.25	0.99	1.05	0.97	1.5	0.98	1.45	0.66	0.16	0.53	0.36	0.18	0.49
402	8	Peroxisomal	pSGT	BGIOSGA026721-TA	2099.61	1537.92	2419.04	2064.17	1622.64	1927.03	1459.48	1238.22	1420.27	1872.12	1154.71	1800.33	33.24	8.14	26.61	9.31	9.1	12.79
424	3	Phosphoserine aminotransferase		BGIOSGA011897-TA	23.24	24.55	26.93	13.56	25.92	12.5	246.29	80.48	239.51	45.43	75.04	43.75	64.46	60.58	51.63	43.58	67.84	59.72
410	2	NADH-dependent	pHPR1	BGIOSGA007314-TA	604.86	350.15	697.09	440.6	369.31	415.08	527.62	265.03	513.5	390.9	247.16	376.43	9.24	2.51	7.42	1.7	2.81	2.31
469	1	NADPH-dependent	cHPR2	BGIOSGA002081-TA	121.55	72.93	140.14	80.89	76.94	74.77	90.56	58.95	88.13	93.84	54.98	90.27	31.06	15.09	24.93	9.06	16.82	12.42
175	12		rbcS	BGIOSGA037260-TA	4153.09	2155.21	4790.23	3522.88	2272.97	3252.42	6089.62	3736.45	5926.55	5313.94	3484.6	5106.47	190.09	35.72	152.4	35.59	39.85	49.03
175	NA			BGIOSGA038154-TA	5955.7	1186.44	6878.23	1523.42	1250.91	1421.68	6917.97	2081.05	6732.44	1826.87	1940.63	1755.07	123.17	18.62	98.64	10.11	20.83	13.87
175	12			BGIOSGA037257-TA	20261.3	8973.94	23365	8528.28	9461.69	7854.21	17279.8	10817.9	16816.6	12193.8	10088.2	11735.5	804.36	157.72	645.17	127.03	175.99	174.39
138	NA			BGIOSGA040274-TA	13.12	7354.33	15.1	10779.3	7755.27	9931.45	9.87	9442.33	9.6	16423.4	8806.04	15809.7	43.66	60.28	35.15	151.96	67.23	208.88
175	5			BGIOSGA018498-TA (RBCS)	8683.79	15850.8	10025	5666.7	16710.9	5330.07	8059.88	14030.3	7842.89	9161.54	13083.4	8792.59	294.79	85.03	236.57	66.67	95.05	91.63
183	2			BGIOSGA007558-TA	1.88	3.98	2.16	8.38	4.2	7.46	3.11	4.67	3.02	4.13	4.35	3.97	26.45	19.01	21.22	5.95	21.22	8.14
400	3	Chloroplastic	PDC	BGIOSGA013212-TA	28.44	31	32.84	24.98	32.7	23.02	64.65	39.87	62.91	42.11	37.18	40.53	63.03	56.04	50.58	44.75	62.58	61.23
425	4	Chloroplastic		BGIOSGA015796-TA	6.27	8.86	7.23	8.62	9.36	7.85	33.67	25.51	32.76	33.04	23.79	31.84	57.43	68.65	46.17	48.46	76.61	66.47
239	12			BGIOSGA036512-TA	2.15	1.11	2.47	1.51	1.18	1.46	8.77	2.65	8.54	5.95	2.47	5.73	21.5	24.9	17.25	12.73	27.78	17.41
374	8			BGIOSGA029064-TA	10.4	4.81	12.01	1.04	5.08	0.96	12.65	9.52	12.3	4.23	8.88	4.08	12.07	6.99	9.73	3.82	7.78	5.22
391	12			BGIOSGA037802-TA	18.72	17.94	21.57	14.33	18.94	12.74	96.42	46.91	93.84	64.4	43.74	62.03	62.61	56.64	50.35	45.16	63.16	61.86
398	6	Mitochondrial		BGIOSGA022620-TA	0.22	1.06	0.25	0.54	1.12	0.52	3.18	2.93	3.09	2.94	2.74	2.81	12.61	10.44	10.11	5.16	11.68	7.05
545	6	Mitochondrial		BGIOSGA022101-TA	6.25	3.84	7.19	5.82	4.05	5.31	10.18	8.81	9.91	6.29	8.22	6.07	7.31	9.22	5.89	2.42	10.29	3.32
557	6	Mitochondrial		BGIOSGA021193-TA	5	4.14	5.77	4.74	4.37	4.37	12.47	10.67	12.14	6.57	9.95	6.33	7.53	11.52	6.04	5.14	12.86	7.01
541	7	Mitochondrial		BGIOSGA024430-TA	6.79	7.38	7.84	6.1	7.79	5.55	19.99	15.53	19.45	13.43	14.48	12.95	20.85	14.94	16.77	6.47	16.65	8.88
					LEAF						PEDUNCLE						GRAIN
					G1 v G2		G1 v G3		G2 v G3		G1 v G2		G1 v G3		G2 v G3		G1 v G2		G1 v G3		G2 v G3
AA size	chr	as per homolog of wheat	gene	gene ID	APO	BAM4234	APO	CROSSA	BAM4234	CROSSA	APO	BAM4234	APO	CROSSA	BAM4234	CROSSA	APO	BAM4234	APO	CROSSA	BAM4234	CROSSA
AA: Aminoacid length
Please look into next spreadsheet for Log2 foldchange and FDR significance.
	Column values of the highlighted tissues was used for the graph
	Transcript ids and values with red fonts are not involved in photorespiration process
cp: chloroplast
p: peroxisome
m: mitochondria
c: cytosolic
NA	scaffolds (chromosome number not assigned)
cpPGLP (or PGP): Chloroplastic, Phosphoglycolate phosphatase
pGOX: Glycolate oxidase
pGGT: Glutamate:glyoxylate aminotransferase
mSHMT: Serine hydroxymethyltransferase
mGDC: Glycine decarboxylase
cpGLYK: D-Glycerate 3-kinase, chloroplastic
cpGS2: Glutamine synthetase, chloroplastic
cpGOGAT: Glutamate synthase
pSGT: Serine:glyoxylate aminotransferase
HPR: Hydroxypyruvate reductase
rbcS: Rubisco small subunit
Pdc: Pyruvate dehydrogenase complex

## Sheet: Log2 foldchange + significance
between tissue comparison
					APO (Log2 fold change)						BAM4234 (Log2 fold change)						CROSSA (Log2 fold change)
AA size	chr	as per homolog of wheat	gene	gene ID	L vs P	FDR	L vs G	FDR	P vs G	FDR	L vs P	FDR	L vs G	FDR	P vs G	FDR	L vs P	FDR	L vs G	FDR	P vs G	FDR
303	9		cpPGLP (or PGP)	BGIOSGA030128-TA	0.703172	no	-1.73486	no	-2.46253	yes	0.426737	no	-0.803093	no	-1.19596	no	0.537693	no	-0.627152	no	-1.19074	no
365	4			BGIOSGA014826-TA	-1.5779	no	-6.76584	yes	-5.21422	yes	-1.32333	no	-7.94305	yes	-6.58993	yes	-0.995963	no	-8.31935	yes	-7.39033	yes
308	8	Ancient paralogs		BGIOSGA029099-TA	-0.193374	no	-0.521527	no	-0.357145	no	-0.415623	no	0.274391	no	0.724714	no	-0.0116944	no	0.614952	no	0.60558	no
235	1			BGIOSGA000655-TA	-0.735646	no	0.0393239	no	0.744487	no	-0.475889	no	0.544598	no	1.05072	no	-0.0319255	no	0.17196	no	0.140845	no
231	2			BGIOSGA005367-TA	-0.832153	no	-2.15727	yes	-1.34803	no	-1.03177	no	-1.96932	yes	-0.908314	no	-0.132644	no	-2.02955	no	-1.95776	yes
363	7		pGOX	BGIOSGA026138-TA (GLO4)	1.2077	no	-0.223038	no	-1.45346	yes	1.63567	yes	-0.147759	no	-1.74814	yes	1.38462	no	-0.718522	no	-2.25008	yes
369	7	Peroxisomal		BGIOSGA025165-TA (GLO5)	-1.57526	no	-5.22603	yes	-3.67402	yes	-0.930755	no	-4.02035	yes	-3.06143	yes	-0.450933	no	-4.11183	yes	-3.7167	yes
369	3	Peroxisomal		BGIOSGA013686-TA (GLO1)	-0.792176	no	-6.03124	yes	-5.26138	yes	-0.182026	no	-7.57896	yes	-7.36705	yes	-0.0277754	no	-7.47057	yes	-7.49084	yes
367	4	Peroxisomal		BGIOSGA017163-TA (GLO3)	5.12057	no	5.21995	no	0.084733	no	3.05472	no	3.7409	yes	0.720232	no	2.63793	no	1.6602	no	-1.13171	no
285	4	Ancient paralogs		BGIOSGA017164-TA	-0.745222	no	-1.85301	no	-1.13034	no	0.441305	no	1.591	no	1.18464	no	-1.22285	no	-2.16883	no	-1.12577	no
268	3			BGIOSGA013683-TA	-1.98911	no	#NAME?	no	#NAME?	no	-1.16179	no	-inf	no	-inf	no	-1.33411	no	#NAME?	no	#NAME?	no
172	8			BGIOSGA028153-TA									inf	no	inf	no	0.989505	no	0.785459	no	-0.182259	no
399	NA			BGIOSGA038673-TA
341	NA			BGIOSGA039507-TA
379	NA			BGIOSGA038447-TA
363	4			BGIOSGA015256-TA
485	7	Peroxisomal, identified through Sorghum orthologs	pGGT	BGIOSGA024963-TA	-1.0748	no	-5.13076	yes	-4.08162	yes	-0.416212	no	-4.82694	yes	-4.38082	yes	-0.690971	no	-5.64973	yes	-5.00328	yes
486	3	Mitochondrial		BGIOSGA011956-TA	0.509124	no	3.90309	yes	3.36454	yes	1.18429	no	4.32531	yes	3.17377	yes	2.22199	no	5.52451	yes	3.15729	yes
480	5			BGIOSGA017874-TA	4.92895	yes	1.2562	no	-3.70454	yes	2.0022	yes	-0.598362	no	-2.56759	yes	2.32273	no	-0.475272	no	-2.96619	yes
436	3			BGIOSGA010778-TA	1.00664	no	1.54416	no	0.530882	no	0.0627301	no	-2.77352	no	-2.8119	no	0.743864	no	-0.83659	no	-1.72885	no
347	11		mSHMT	BGIOSGA035211-TA	-0.345235	no	-1.38509	no	-1.0614	yes	0.0900848	no	-1.11612	no	-1.17622	no	1.02964	no	-0.811045	no	-1.89745	yes
531	6			BGIOSGA022876-TA	0.813986	no	2.48671	yes	1.65047	yes	0.48333	no	2.71057	yes	2.2696	yes	0.750352	no	2.13398	no	1.34514	yes
571	5			BGIOSGA018007-TA	-1.46574	no	-3.36283	yes	-1.93056	yes	-0.723348	no	-2.81043	yes	-2.05888	yes	-0.667019	no	-2.57545	yes	-1.94758	yes
513	3			BGIOSGA013524-TA	-1.36761	no	-5.58124	yes	-4.23728	yes	-0.446374	no	-4.24569	yes	-3.76899	yes	-0.536779	no	-4.83658	yes	-4.3452	yes
294	12			BGIOSGA036327-TA	0.611303	no	#NAME?	no	#NAME?	no	0.144221	no	1.13197	no	1.01909	no	0.181064	no	1.19399	no	0.907623	no
600	1			BGIOSGA004904-TA	-0.861541	no	-1.4961	yes	-0.666007	no	-0.802196	no	-0.331079	no	0.50263	no	-0.0902899	no	-0.313809	no	-0.24966	no
1033	1	P protein	mGDC	BGIOSGA004313-TA	-1.65495	no	-5.64714	yes	-4.01568	yes	-2.0011	yes	-5.78263	yes	-3.75387	yes	-0.994711	no	-5.03623	yes	-4.08595	yes
1031	6	P protein		BGIOSGA020897-TA	-1.66802	no	-6.44768	yes	-4.80518	yes	-1.55513	no	-7.41541	yes	-5.83185	yes	-1.27755	no	-7.28769	yes	-6.03427	yes
468	NA			BGIOSGA040295-TA
418	1		cpGLYK	BGIOSGA004212-TA	-1.35144	no	-5.96999	yes	-4.64658	yes	-0.578118	no	-5.04812	yes	-4.44198	yes	-0.740001	no	-5.16513	yes	-4.49636	yes
428	4	Chloroplastic	cpGS2	BGIOSGA014182-TA	-1.11014	no	-6.02294	yes	-4.93851	yes	-0.640129	no	-6.49757	yes	-5.82453	yes	-0.672582	no	-7.02459	yes	-6.44254	yes
370	3	Cytosolic		BGIOSGA009926-TA	0.0759866	no	7.41574	no	7.32011	no	1.43625	no	6.53794	yes	5.14061	yes	3.05471	no	8.54809	no	5.36711	yes
364	2			BGIOSGA005667-TA	0.234652	no	-3.87495	yes	-4.12964	yes	-0.026182	no	-5.24513	yes	-5.18888	yes	0.670295	no	-4.91815	yes	-5.71901	yes
357	3			BGIOSGA011196-TA	3.33614	yes	4.06685	yes	0.702417	no	3.26802	yes	3.04968	yes	-0.183226	no	2.95766	no	3.99105	yes	0.946345	no
1615	7	Ferredoxin-dependent	cpGOGAT	BGIOSGA023784-TA	-0.471092	no	-5.1657	yes	-4.72482	yes	0.485652	no	-3.38697	yes	-3.84037	yes	-0.173073	no	-3.83639	yes	-3.69714	yes
340	9	Bact D SU		BGIOSGA031228-TA
2157	1	NADH-dependent		BGIOSGA001013-TA	0.0300109	no	1.41929	no	1.35424	yes	0.25433	no	1.64736	yes	1.42693	yes	-0.100129	no	2.31135	yes	2.26394	yes
2193	5	NADH-dependent		BGIOSGA020330-TA	1.11316	no	0.772639	no	-0.36962	no	0.23032	no	-2.22157	no	-2.41988	no	-0.241483	no	-1.73123	no	-1.63314	no
402	8	Peroxisomal	pSGT	BGIOSGA026721-TA	-1.13374	no	-6.34816	yes	-5.23284	yes	-0.94249	no	-7.89174	yes	-6.92041	yes	-0.535561	no	-7.73008	yes	-7.22221	yes
424	3	Phosphoserine aminotransferase		BGIOSGA011897-TA	2.79774	yes	1.11997	no	-1.69201	yes	1.08561	no	0.974618	no	-0.0784799	no	1.36657	no	1.80075	no	0.374173	no
410	2	NADH-dependent	pHPR1	BGIOSGA007314-TA	-0.80407	no	-6.39324	yes	-5.61235	yes	-1.0332	no	-7.45336	yes	-6.39285	yes	-0.579007	no	-7.95245	yes	-7.40297	yes
469	1	NADPH-dependent	cHPR2	BGIOSGA002081-TA	-1.03218	no	-2.32936	yes	-1.32223	yes	-0.937345	no	-2.60818	yes	-1.6395	yes	-0.16764	no	-3.04959	yes	-2.93817	yes
175	12		rbcS	BGIOSGA037260-TA	-0.0534112	no	-4.81106	yes	-4.78167	yes	0.162167	no	-6.24831	yes	-6.38202	yes	0.212637	no	-6.53824	yes	-6.79711	yes
175	NA			BGIOSGA038154-TA	-0.387806	no	-5.95542	yes	-5.59307	yes	0.178142	no	-6.32162	yes	-6.47456	yes	-0.13221	no	-7.16175	yes	-7.06442	yes
175	12			BGIOSGA037257-TA	-0.836163	no	-5.01643	yes	-4.2	yes	-0.362967	no	-6.16275	yes	-5.77274	yes	0.138829	no	-5.95429	yes	-6.15258	yes
138	NA			BGIOSGA040274-TA	-1.02082	no	1.37415	no	2.37802	yes	-0.271383	no	-7.26427	yes	-6.96492	yes	0.230077	no	-6.039	yes	-6.32521	yes
175	5			BGIOSGA018498-TA (RBCS)	-0.713635	no	-5.23855	yes	-4.54465	yes	-0.808872	no	-7.87189	no	-7.03745	yes	0.288466	no	-6.37209	yes	-6.67371	yes
183	2			BGIOSGA007558-TA	0.11585	no	3.449	no	3.30863	yes	-0.403054	no	1.92386	no	2.35316	yes	-1.35293	no	-0.242452	no	0.963309	no
400	3	Chloroplastic	PDC	BGIOSGA013212-TA	0.579465	no	0.79114	no	0.18654	no	-0.267141	no	0.521847	no	0.819441	no	0.37592	no	0.96988	no	0.525906	no
425	4	Chloroplastic		BGIOSGA015796-TA	1.81728	yes	2.83826	yes	0.998164	yes	0.896542	no	2.61918	yes	1.75542	yes	1.57671	no	2.6516	yes	0.98733	yes
239	12			BGIOSGA036512-TA	1.41857	no	2.95634	yes	1.51038	yes	0.62763	no	4.14433	yes	3.55668	yes	1.54155	no	3.05851	no	1.53818	yes
374	8			BGIOSGA029064-TA	-0.322397	no	-0.133715	no	0.162	no	0.35908	no	0.200317	no	-0.121019	no	1.63848	no	1.98595	no	0.29188	no
391	12			BGIOSGA037802-TA	1.75702	yes	1.38186	yes	-0.397663	no	0.759027	no	1.32264	no	0.598347	no	1.83625	no	1.90754	yes	-0.0743901	no
398	6	Mitochondrial		BGIOSGA022620-TA	3.21898	no	5.45053	no	2.21241	yes	0.845164	no	2.97178	yes	2.15941	yes	2.0185	no	3.28428	no	1.25225	no
545	6	Mitochondrial		BGIOSGA022101-TA	0.0933947	no	-0.135672	no	-0.256947	no	0.572469	no	0.929902	no	0.391983	no	-0.252112	no	-1.09889	no	-0.936679	no
557	6	Mitochondrial		BGIOSGA021193-TA	0.716057	no	0.235347	no	-0.508314	no	0.738475	no	1.14316	no	0.43731	no	0.0922394	no	0.25384	no	0.0877455	no
541	7	Mitochondrial		BGIOSGA024430-TA	0.956505	no	1.26516	no	0.280038	no	0.445026	no	0.680354	no	0.269349	no	0.777154	no	0.244389	no	-0.619965	no
between genotype comparison
					LEAF (Log2 fold change)						PEDUNCLE (Log2 fold change)						GRAIN (Log2 fold change)
AA size	chr	as per homolog of wheat	gene	gene ID	G1 vs G2	FDR	G1 vs G3	FDR	G2 vs G3	FDR	G1 vs G2	FDR	G1 vs G3	FDR	G2 vs G3	FDR	G1 vs G2	FDR	G1 vs G3	FDR	G2 vs G3	FDR
303	9		cpPGLP (or PGP)	BGIOSGA030128-TA	0.110934	no	-0.57602	no	-0.636814	no	-0.149979	no	-0.69385	no	-0.534381	no	1.01986	no	0.62331	no	-0.424321	no
365	4			BGIOSGA014826-TA	-1.03738	no	-1.20805	no	-0.153407	no	-0.762596	no	-0.606544	no	0.160153	no	-2.25182	no	-2.7342	no	-0.517627	no
308	8	Ancient paralogs		BGIOSGA029099-TA	0.0595728	no	-1.04559	no	-1.0648	no	-0.145431	no	-0.82342	no	-0.668452	no	0.829465	no	0.192237	no	-0.658037	no
235	1			BGIOSGA000655-TA	-0.249843	no	-0.298078	no	-0.0268937	no	0.0411327	no	0.441369	no	0.40358	no	0.239596	no	-0.101395	no	-0.366402	no
231	2			BGIOSGA005367-TA	-0.374404	no	-0.57072	no	-0.174333	no	-0.544592	no	0.161077	no	0.711839	no	-0.204581	no	-0.388054	no	-0.207062	no
363	7		pGOX	BGIOSGA026138-TA (GLO4)	0.74457	no	1.21056	no	0.421738	no	1.18434	yes	1.34989	yes	0.175845	no	0.775989	no	0.599846	no	-0.210749	no
369	7	Peroxisomal		BGIOSGA025165-TA (GLO5)	-0.896501	no	-0.895637	no	0.0240414	no	-0.229546	no	0.255243	no	0.49047	no	0.278128	no	0.26848	no	-0.0396767	no
369	3	Peroxisomal		BGIOSGA013686-TA (GLO1)	-0.783788	no	-0.478801	no	0.323579	no	-0.15347	no	0.306045	no	0.466952	no	-2.36747	yes	-1.85979	yes	0.481096	no
367	4	Peroxisomal		BGIOSGA017163-TA (GLO3)	1.10408	no	2.20239	no	1.03475	no	-0.956393	no	-0.345079	no	0.62142	no	-0.425154	no	-1.50175	no	-1.09604	no
285	4	Ancient paralogs		BGIOSGA017164-TA	-1.48776	no	0.208611	no	1.6345	no	-0.288434	no	-0.325148	no	-0.0227117	no	1.93777	no	-0.259405	no	-2.21307	no
268	3			BGIOSGA013683-TA	0.124622	no	0.148381	no	-0.0178056	no	0.980361	no	0.787346	no	-0.190599	no
172	8			BGIOSGA028153-TA			inf	no	inf	no			inf	no	inf	no	inf	no	inf	no	-0.429028	no
399	NA			BGIOSGA038673-TA
341	NA			BGIOSGA039507-TA
379	NA			BGIOSGA038447-TA
363	4			BGIOSGA015256-TA
485	7	Peroxisomal, identified through Sorghum orthologs	pGGT	BGIOSGA024963-TA	-1.21751	no	-0.435149	no	0.806158	no	-0.537278	no	-0.0244263	no	0.519774	no	-0.946526	no	-0.887689	no	0.0334686	no
486	3	Mitochondrial		BGIOSGA011956-TA	-0.104024	no	-1.3385	no	-1.26715	no	0.597039	no	0.358838	no	-0.229085	no	0.300267	no	0.201088	no	-0.125068	no
480	5			BGIOSGA017874-TA	2.62289	no	2.45031	no	-0.218084	no	-0.275032	no	-0.180151	no	0.098554	no	0.742531	no	0.609967	no	-0.167451	no
436	3			BGIOSGA010778-TA	2.40572	no	1.8836	no	-0.602272	no	1.46475	no	1.52994	no	0.0687531	no	-1.97278	no	-0.621537	no	1.34507	no
347	11		mSHMT	BGIOSGA035211-TA	-0.213057	no	-0.648494	no	-0.422195	no	0.245576	no	0.745422	no	0.507197	no	0.0307931	no	-0.019945	no	-0.0703691	no
531	6			BGIOSGA022876-TA	-1.55322	no	-1.39861	no	0.175917	no	-1.86942	yes	-1.43556	yes	0.440966	no	-1.35204	no	-1.67521	yes	-0.339291	no
571	5			BGIOSGA018007-TA	-0.456237	no	-0.999279	no	-0.509369	no	0.315493	no	-0.158193	no	-0.46768	no	0.0728121	no	-0.11491	no	-0.215091	no
513	3			BGIOSGA013524-TA	-1.25338	no	-0.76027	no	0.519276	no	-0.312693	no	0.098689	no	0.418886	no	0.0464256	no	0.0412402	no	-0.0341311	no
294	12			BGIOSGA036327-TA	8.39498	no	8.92439	no	0.533997	no	7.95126	no	8.51258	no	0.569027	no	inf	yes	inf	yes	0.579907	no
600	1			BGIOSGA004904-TA	-0.866895	no	-1.24797	no	-0.340579	no	-0.784227	no	-0.43215	no	0.35895	no	0.277567	no	0.0425986	no	-0.256179	no
1033	1	P protein	mGDC	BGIOSGA004313-TA	0.157949	no	-0.622574	no	-0.750649	no	-0.161953	no	0.0720938	no	0.240736	no	-0.00643169	no	0.0597213	no	0.0387779	no
1031	6	P protein		BGIOSGA020897-TA	-0.167527	no	-0.304811	no	-0.103981	no	-0.0273325	no	0.125544	no	0.158974	no	-1.16672	no	-1.03352	no	0.109464	no
468	NA			BGIOSGA040295-TA
418	1		cpGLYK	BGIOSGA004212-TA	-0.87972	no	-0.550919	no	0.343607	no	-0.0853685	no	0.0774291	no	0.170212	no	0.00200508	no	0.27194	no	0.231512	no
428	4	Chloroplastic	cpGS2	BGIOSGA014182-TA	-0.735738	no	-0.518983	no	0.207237	no	-0.24408	no	-0.0836285	no	0.169014	no	-1.23674	no	-1.53624	yes	-0.315165	no
370	3	Cytosolic		BGIOSGA009926-TA	1.78905	no	-0.822478	no	-2.64719	no	3.16542	no	2.1336	no	-1.01887	no	0.8779	no	0.234299	no	-0.669497	no
364	2			BGIOSGA005667-TA	0.539027	no	0.34665	no	-0.227425	no	0.297209	no	0.752258	no	0.462329	no	-0.865141	no	-0.768167	no	0.0731359	no
357	3			BGIOSGA011196-TA	0.241594	no	-0.657824	no	-0.895867	no	0.193087	no	-1.02339	no	-1.21044	yes	-0.792186	no	-0.716637	no	0.0489723	no
1615	7	Ferredoxin-dependent	cpGOGAT	BGIOSGA023784-TA	-1.60142	no	-1.29031	no	0.346432	no	-0.621589	no	-0.95237	no	-0.321424	no	0.150357	no	0.124742	no	-0.0506803	no
340	9	Bact D SU		BGIOSGA031228-TA
2157	1	NADH-dependent		BGIOSGA001013-TA	-0.0164726	no	-0.229792	no	-0.24691	no	0.226495	no	-0.383132	no	-0.603131	no	0.197395	no	0.580812	no	0.360479	no
2193	5	NADH-dependent		BGIOSGA020330-TA	0.938162	no	2.01773	no	1.03169	no	0.0820737	no	0.632669	no	0.563761	no	-2.07546	no	-0.568471	no	1.49568	no
402	8	Peroxisomal	pSGT	BGIOSGA026721-TA	-0.449145	no	-0.228872	no	0.248036	no	-0.237185	no	0.398507	no	0.640734	no	-2.03023	yes	-1.51511	yes	0.490319	no
424	3	Phosphoserine aminotransferase		BGIOSGA011897-TA	0.0787752	no	-0.989705	no	-1.05239	no	-1.61367	yes	-2.39834	yes	-0.778371	no	-0.0895639	no	-0.244471	no	-0.183962	no
410	2	NADH-dependent	pHPR1	BGIOSGA007314-TA	-0.78863	no	-0.661868	no	0.168559	no	-0.993382	no	-0.393556	no	0.606919	no	-1.87834	no	-2.12965	no	-0.279683	no
469	1	NADPH-dependent	cHPR2	BGIOSGA002081-TA	-0.736975	no	-0.792725	no	-0.0412935	no	-0.6193	no	0.0905736	no	0.715379	no	-1.04116	no	-1.46064	yes	-0.437484	no
175	12		rbcS	BGIOSGA037260-TA	-0.946359	no	-0.443339	no	0.516937	no	-0.704683	no	-0.157409	no	0.551336	no	-2.41169	yes	-2.09842	yes	0.299239	no
175	NA			BGIOSGA038154-TA	-2.32764	no	-2.17472	no	0.184624	no	-1.73303	yes	-1.88176	yes	-0.144993	no	-2.72604	yes	-3.28616	yes	-0.586964	no
175	12			BGIOSGA037257-TA	-1.17491	no	-1.45402	no	-0.268631	no	-0.675672	no	-0.463737	no	0.218206	no	-2.35049	yes	-2.34445	yes	-0.0131817	no
138	NA			BGIOSGA040274-TA	9.13078	yes	9.4791	yes	0.356827	no	9.90195	yes	10.7398	yes	0.844248	no	0.465176	no	2.11226	yes	1.63547	yes
175	5			BGIOSGA018498-TA (RBCS)	0.868162	no	-0.823019	no	-1.64856	no	0.799716	no	0.224205	no	-0.573378	no	-1.79374	yes	-1.82712	yes	-0.0528018	no
183	2			BGIOSGA007558-TA	1.08459	no	1.95675	no	0.829884	no	0.586916	no	0.450728	no	-0.132112	no	-0.476607	no	-1.83443	no	-1.38236	no
400	3	Chloroplastic	PDC	BGIOSGA013212-TA	0.124307	no	-0.394491	no	-0.506754	no	-0.697595	no	-0.579001	no	0.124731	no	-0.169494	no	-0.17678	no	-0.0314742	no
425	4	Chloroplastic		BGIOSGA015796-TA	0.4997	no	0.253359	no	-0.253734	no	-0.400472	no	0.0125617	no	0.420503	no	0.257306	no	0.07007	no	-0.205014	no
239	12			BGIOSGA036512-TA	-0.944642	no	-0.707529	no	0.304797	no	-1.72659	no	-0.521158	no	1.21335	no	0.212066	no	-0.43853	no	-0.674432	no
374	8			BGIOSGA029064-TA	-1.11194	no	-3.5304	no	-2.398	no	-0.409078	no	-1.54075	no	-1.12377	no	-0.788747	no	-1.35025	no	-0.57604	no
391	12			BGIOSGA037802-TA	-0.0613946	no	-0.589734	no	-0.572174	no	-1.03962	no	-0.543134	no	0.503977	no	-0.144728	no	-0.156799	no	-0.0298739	no
398	6	Mitochondrial		BGIOSGA022620-TA	2.25252	no	1.09299	no	-1.11573	no	-0.116053	no	-0.0743098	no	0.0398933	no	-0.272207	no	-0.969879	no	-0.728971	no
545	6	Mitochondrial		BGIOSGA022101-TA	-0.70431	no	-0.304674	no	0.390269	no	-0.208665	no	-0.655522	no	-0.437451	no	0.335494	no	-1.2804	no	-1.63224	no
557	6	Mitochondrial		BGIOSGA021193-TA	-0.271357	no	-0.282311	no	0.000691382	no	-0.225266	no	-0.885349	no	-0.653785	no	0.614693	no	-0.234937	no	-0.874971	no
541	7	Mitochondrial		BGIOSGA024430-TA	0.120779	no	-0.361359	no	-0.488999	no	-0.364274	no	-0.534422	no	-0.16126	no	-0.48083	no	-1.37441	yes	-0.906336	no
					LEAF (Log2 fold change)						PEDUNCLE (Log2 fold change)						GRAIN (Log2 fold change)
					G1 vs G2	FDR	G1 vs G3	FDR	G2 vs G3	FDR	G1 vs G2	FDR	G1 vs G3	FDR	G2 vs G3	FDR	G1 vs G2	FDR	G1 vs G3	FDR	G2 vs G3	FDR
AA: aminoacid length
L: leaf
P: peduncle
G: grain
G1: APO
G2: BAM4234
G3: CROSSA
FDR: significance at False discovery rate 0.01 cut-off
	significant fold changes between genotypes alone are highlighted
	Transcript ids and values with red fonts are not involved in photorespiration process
cpPGLP (or PGP): Chloroplastic, Phosphoglycolate phosphatase
pGOX: Glycolate oxidase
pGGT: Glutamate:glyoxylate aminotransferase
mSHMT: Serine hydroxymethyltransferase
mGDC: Glycine decarboxylase
cpGLYK: D-Glycerate 3-kinase, chloroplastic
cpGS2: Glutamine synthetase, chloroplastic
cpGOGAT: Glutamate synthase
pSGT: Serine:glyoxylate aminotransferase
HPR: Hydroxypyruvate reductase
rbcS: Rubisco small subunit
Pdc: Pyruvate dehydrogenase complex

## Sheet: Ratio
		cpPGLP (or PGP)		pGOX			pGGT	mSHMT				mGDC		cpGLYK	cpGS2	cpGOGAT	pSGT	pHPR1	cHPR2	rbcS					cpPDC
		BGIOSGA030128-TA	BGIOSGA014826-TA	BGIOSGA025165-TA (GLO5)	BGIOSGA013686-TA (GLO1)	BGIOSGA017163-TA (GLO3)	BGIOSGA024963-TA	BGIOSGA035211-TA	BGIOSGA022876-TA	BGIOSGA018007-TA	BGIOSGA013524-TA	BGIOSGA004313-TA	BGIOSGA020897-TA	BGIOSGA004212-TA	BGIOSGA014182-TA	BGIOSGA023784-TA	BGIOSGA026721-TA	BGIOSGA007314-TA	BGIOSGA002081-TA	BGIOSGA037260-TA	BGIOSGA038154-TA	BGIOSGA037257-TA	BGIOSGA040274-TA	BGIOSGA018498-TA (RBCS)	BGIOSGA013212-TA	BGIOSGA015796-TA
APO	LEAF	11.57	1033.18	1194.16	860.78	0.48	914.97	113.03	7.32	34.69	1409.81	787.61	589.47	327.63	885.56	76.68	2140.1	616.1	123.72	4223.55	6042.51	20615.1	13.39	8817.52	28.86	6.37
	GRAIN	3.47	9.49	31.91	13.16	17.72	26.12	43.27	41	3.37	29.45	15.72	6.75	5.23	13.62	2.14	26.27	7.33	24.62	150.46	97.38	636.93	34.7	233.55	49.93	45.58
	PEDUNCLE	22.37	410.88	475.15	588.39	19.5	515.56	105.36	15.23	14.98	648.11	296.53	220	152.58	487.52	65.88	1151.08	418.3	71.79	4824.76	5478.53	13649.6	7.79	6356.37	51.17	26.62
BAM4234	LEAF	15.2681	614.377	784.678	610.638	1.23001	480.997	119.604	3.05255	31.1911	720.884	1076.07	644.39	217.266	648.083	30.9554	1915.65	436.031	90.8402	2683.71	1476.82	11170.9	9156.49	19729.4	38.62	11.05
	GRAIN	8.75045	2.49654	48.3556	3.19367	16.445	16.9468	55.177	19.9814	4.44637	38.0001	19.5477	3.77475	6.56685	7.17244	2.95907	8.0661	2.4879	14.8984	35.3026	18.4643	155.925	59.5616	84.2246	55.44	67.88
	PEDUNCLE	27.2063	326.229	547.217	715.374	13.5443	479.043	169.182	5.63341	25.1342	702.243	357.693	291.602	193.611	552.381	57.5573	1324.94	283.666	63.0737	3998.86	2226.09	11575.1	10105.9	15009.1	42.65	27.3
CROSSA	LEAF	9.77	533.84	774.2	739.56	2.28	816.43	85.66	3.35	21.32	1008.12	623.47	585.52	265.66	705.65	38.56	2220.63	483.74	84.9	3686.74	1635.75	8876.97	11226.5	6201.17	26.01	8.72
	GRAIN	6.33	1.67	44.78	4.17	7.19	16.26	48.82	14.71	3.58	35.28	19	3.75	7.4	5.42	2.7	10.46	1.95	10.25	39.67	11.42	143.17	170.74	74.87	50.95	54.8
	PEDUNCLE	14.64	285.66	601.58	772.39	16.23	536.54	187.88	5.98	14.22	733.13	330.59	254.76	170.1	484.38	35.89	1617.81	337.6	81.07	4592.28	1579.03	10533.5	14185.6	7921.62	36.38	28.53
APO	ratio between leaf and grain expression, green highlighted if ratio is higher than that of the rbcS.	3.33429	108.87	37.4228	65.4088	0.027088	35.0295	2.6122	0.178537	10.2938	47.8713	50.1024	87.3289	62.6444	65.0191	35.8318	81.4656	84.0518	5.02518	28.0709	62.0508	32.3664	0.385879	37.7543	0.578009	0.139754		green highlighted cells are greater than yellow highlighted cell (32.3664 #W16) in the same row
BAM4234	ratio between leaf and grain expression, green highlighted if ratio is higher than that of the rbcS.	1.74484	246.091	16.2272	191.203	0.0747954	28.3828	2.16764	0.15277	7.01496	18.9706	55.0484	170.711	33.0853	90.3574	10.4612	237.494	175.261	6.09731	76.0202	79.9825	71.6428	153.731	234.247	0.696609	0.162787	152.945	green highlighted cells are greater than yellow highlighted cell (152.95 #AB17, average of W17 and Y17) in the same row
CROSSA	ratio between leaf and grain expression, green highlighted if ratio is higher than that of the rbcS.	1.54344	319.665	17.289	177.353	0.317107	50.2109	1.75461	0.227736	5.95531	28.5748	32.8142	156.139	35.9	130.194	14.2815	212.297	248.072	8.28293	92.9352	143.236	62.003	65.752	82.8258	0.5105	0.159124		green highlighted cells are greater than yellow highlighted cell (65.752 #X18) in the same row
purple highlighted values are those with expression values greater in developing grains than leaf in comparison with devel
yellow highlighted ones are the actual gene copies associated with photorespiratory process
